# Supplementary material
Source: PubMed Central journal article supplement (PMC5559006)
Supplement: pnas.1701868114.sapp.pdf [file pnas.1701868114.sapp.pdf]

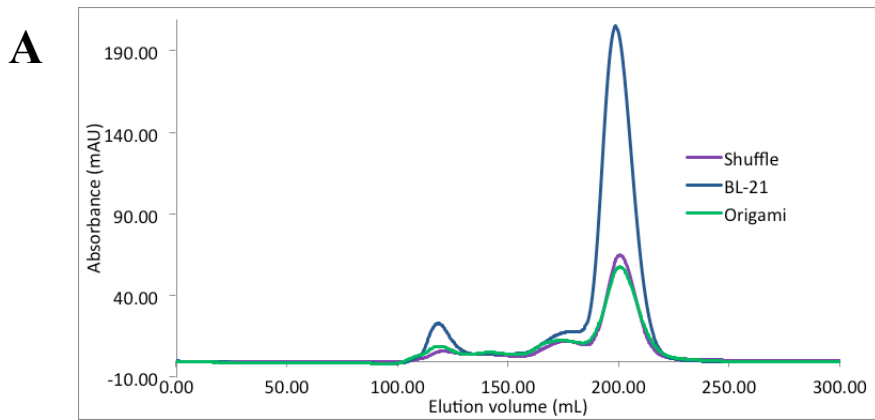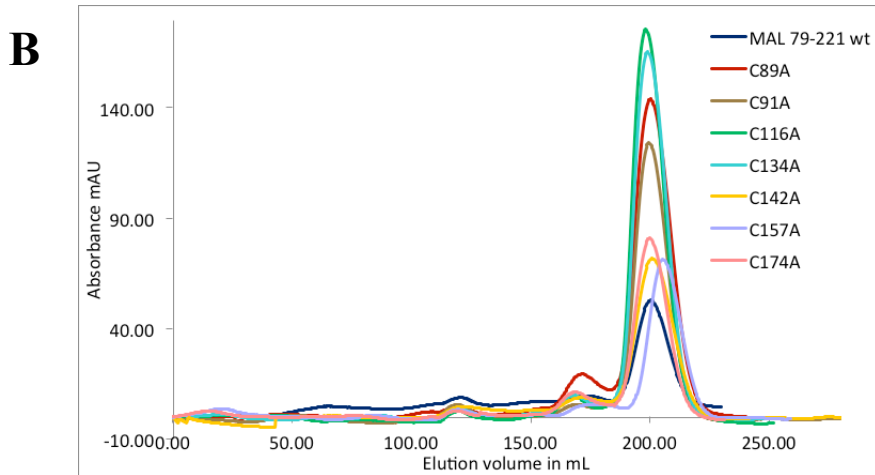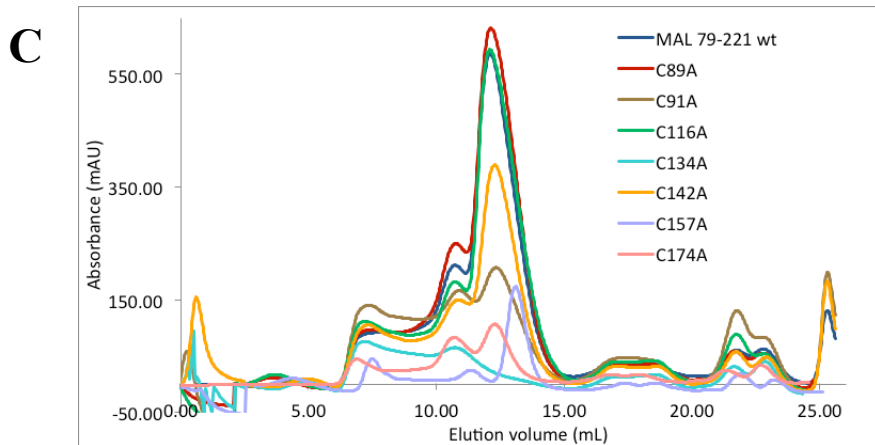

**SI Appendix, Fig. S1.** Size-exclusion chromatography of MAL<sup>TIR</sup> and its cysteine mutants in different *E. coli* strains. (A) Size-exclusion chromatography of MAL<sup>TIR</sup> produced in three different *E. coli* cell types. (B) Size-exclusion chromatography of MAL<sup>TIR</sup> and single-cysteine mutants produced in BL21 *E. coli* cells. (C) Size-exclusion chromatography of MAL<sup>TIR</sup> and single-cysteine mutants produced in SHuffle *E. coli* cells. Each protein was eluted from a Superdex 75 26/600 (A, B) or Superdex 75 10/300 (C) (GE Healthcare) columns in a buffer consisting of 20 mM Tris (pH 8.6) with 200 mM NaCl.

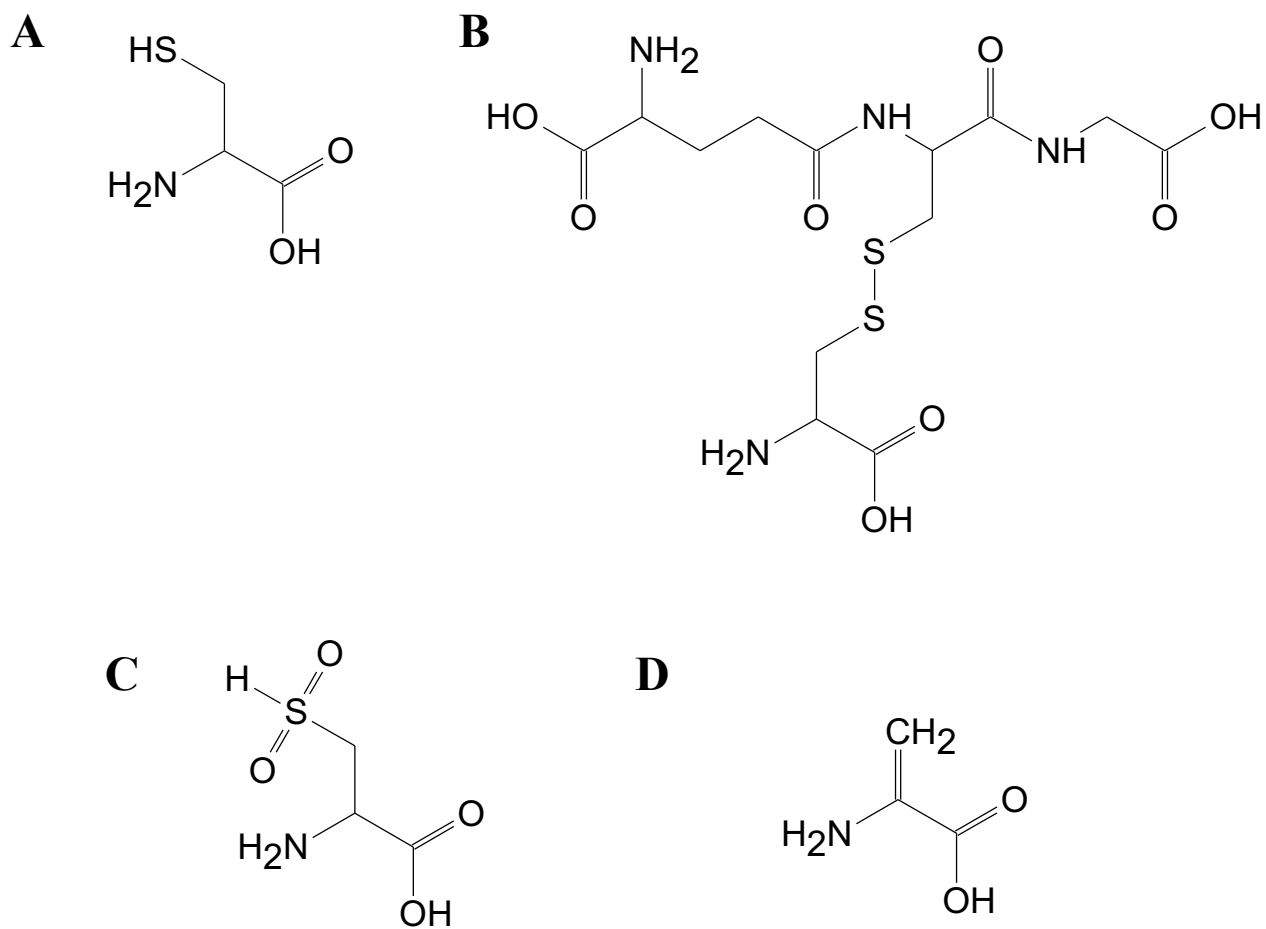

**SI Appendix, Fig. S2.** Structure of the amino-acid L-cysteine (A), and its modifications *S*-glutathionylation (B), dioxidation (C) and dehydroalanine (D).

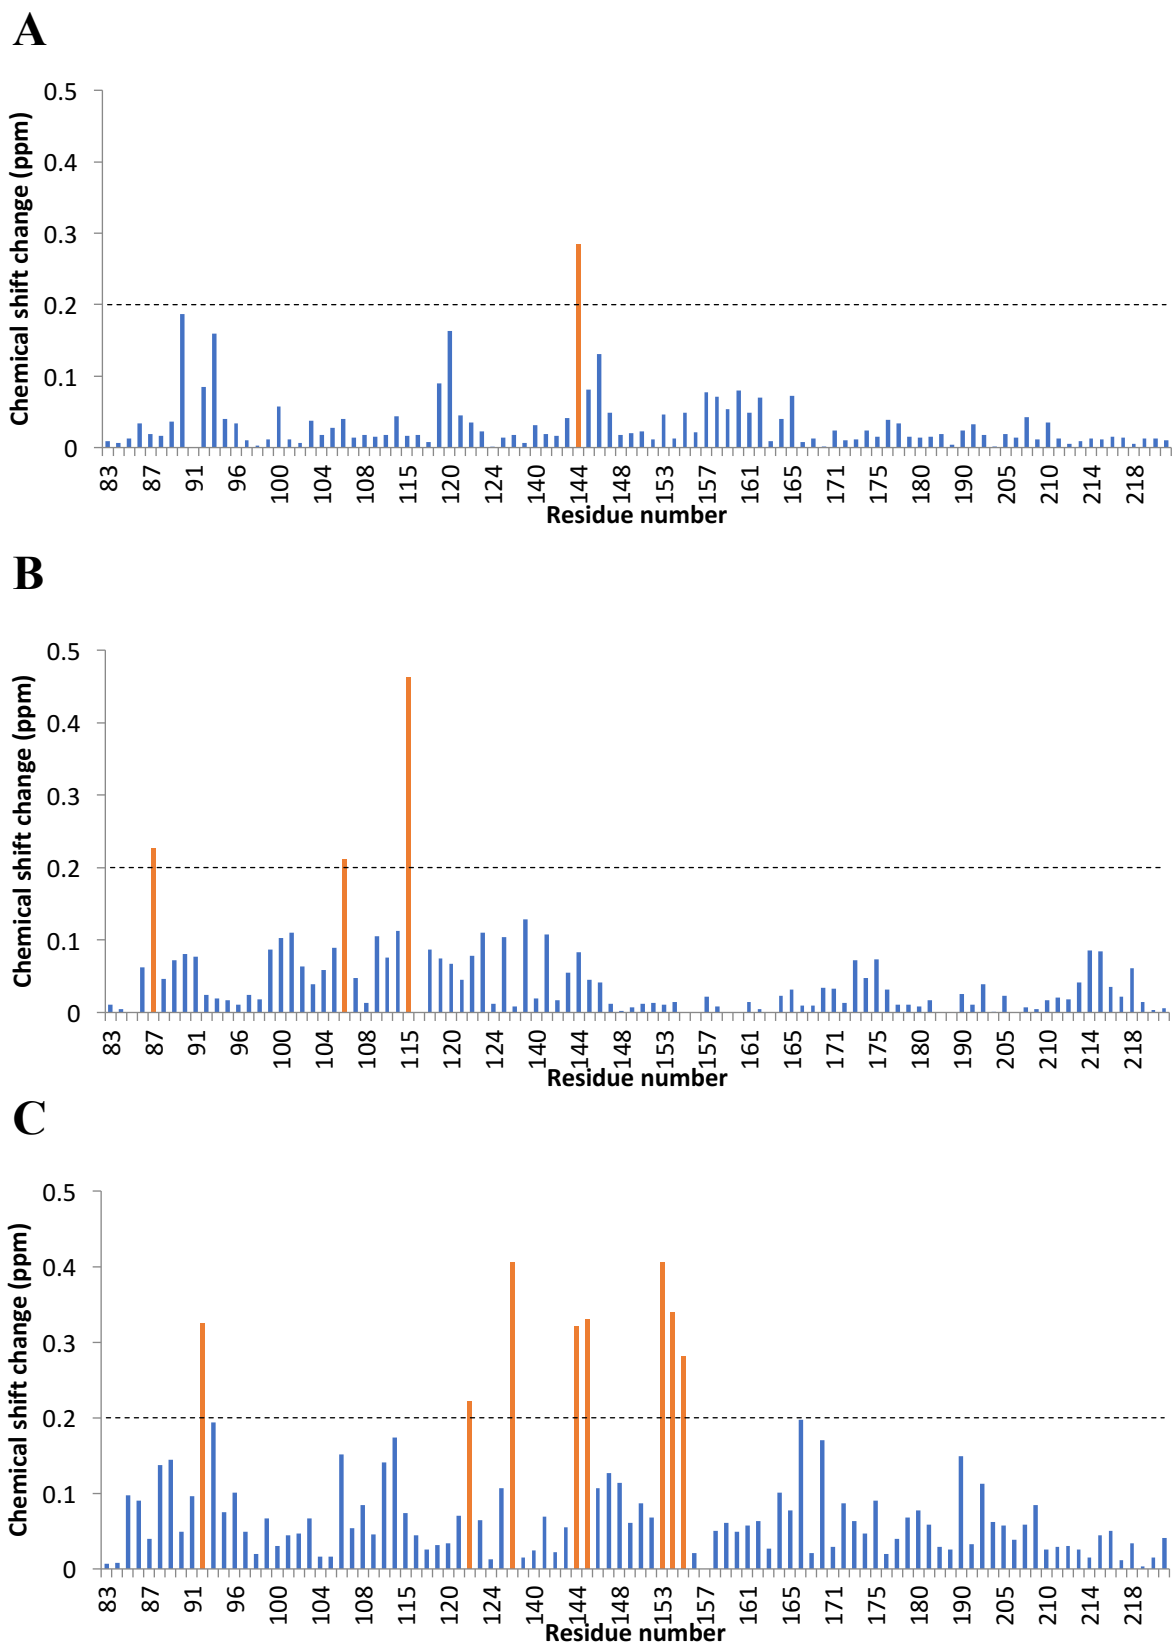

**SI Appendix, Fig. S3.** Comparison of chemical shifts between the (A) C91A, (B) C116A and (C) C157A mutants and the wild-type MAL<sup>TIR</sup> protein. The following residues were not assigned in at least one of the spectra and were therefore excluded from the analysis: 94, 110-112, 119, 125-128, 131-136, 128,139, 149, 155, 169-170, 177, 181, 183-185, 188-189, 192-198, 201-203, 207.

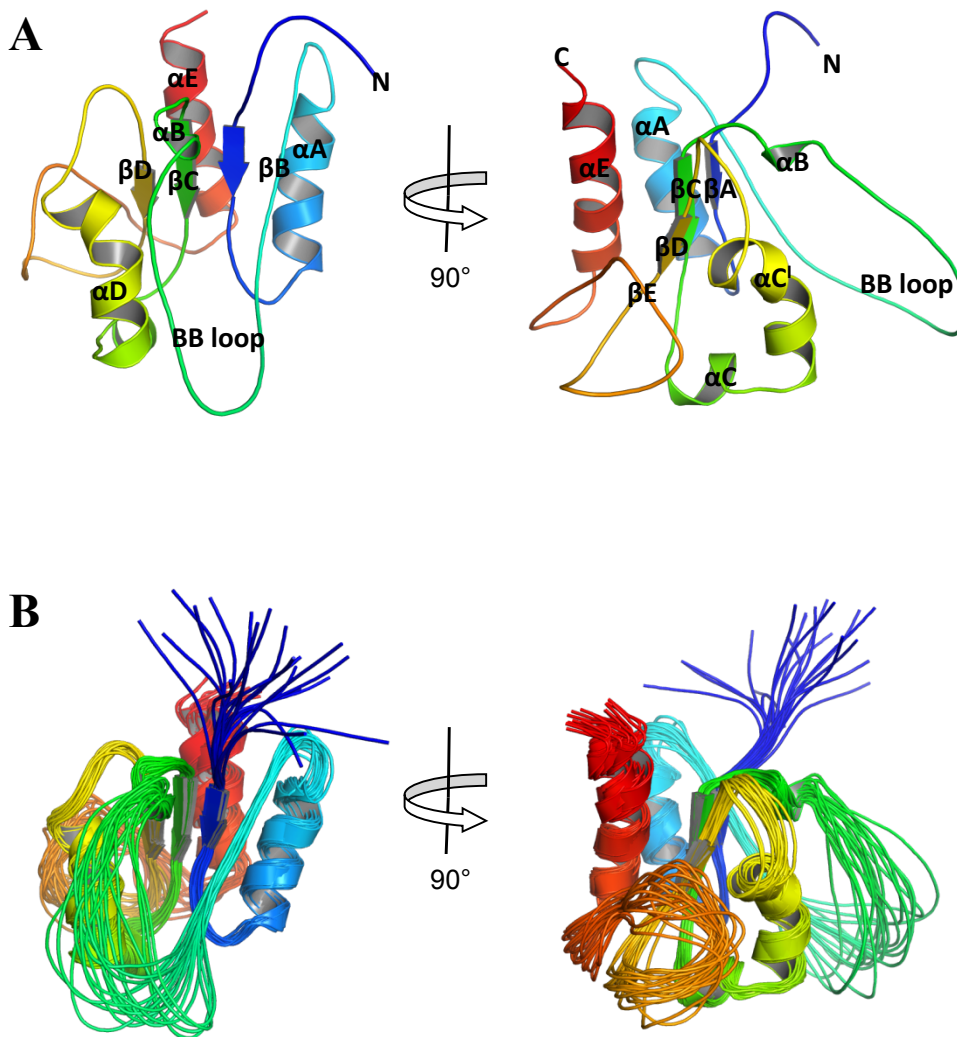

**SI Appendix, Fig. S4.** (A) NMR solution structure of human MAL<sup>TIRC116A</sup>. The views are related by a rotation of 90° around the y-axis. (B) Top-twenty lowest-energy models, showing the inherent flexibility of the BB-loop in green. The views are related by a rotation of 90° around the y-axis.

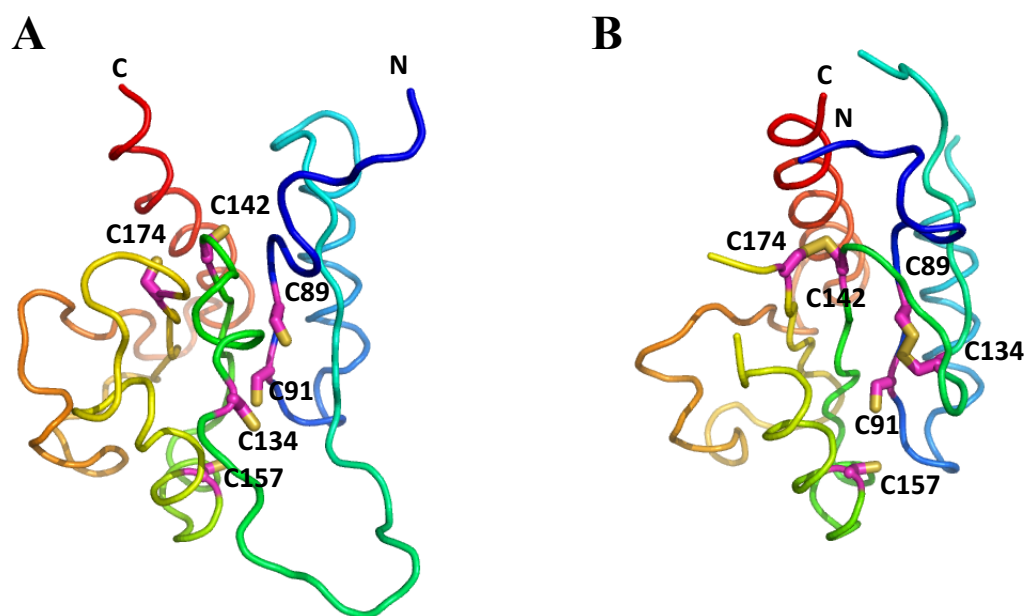

**SI Appendix, Fig. S5.** (A) NMR solution structure of human MAL<sup>TIRC116A</sup> (in ribbon representation, colored continuously from N [blue] to C-terminus [red]), highlighting the side-chains of the cysteine residues (in stick representation, with sulfurs in yellow and carbons in magenta). (B) Crystal structure of human MAL<sup>TIR</sup>, shown as in A.

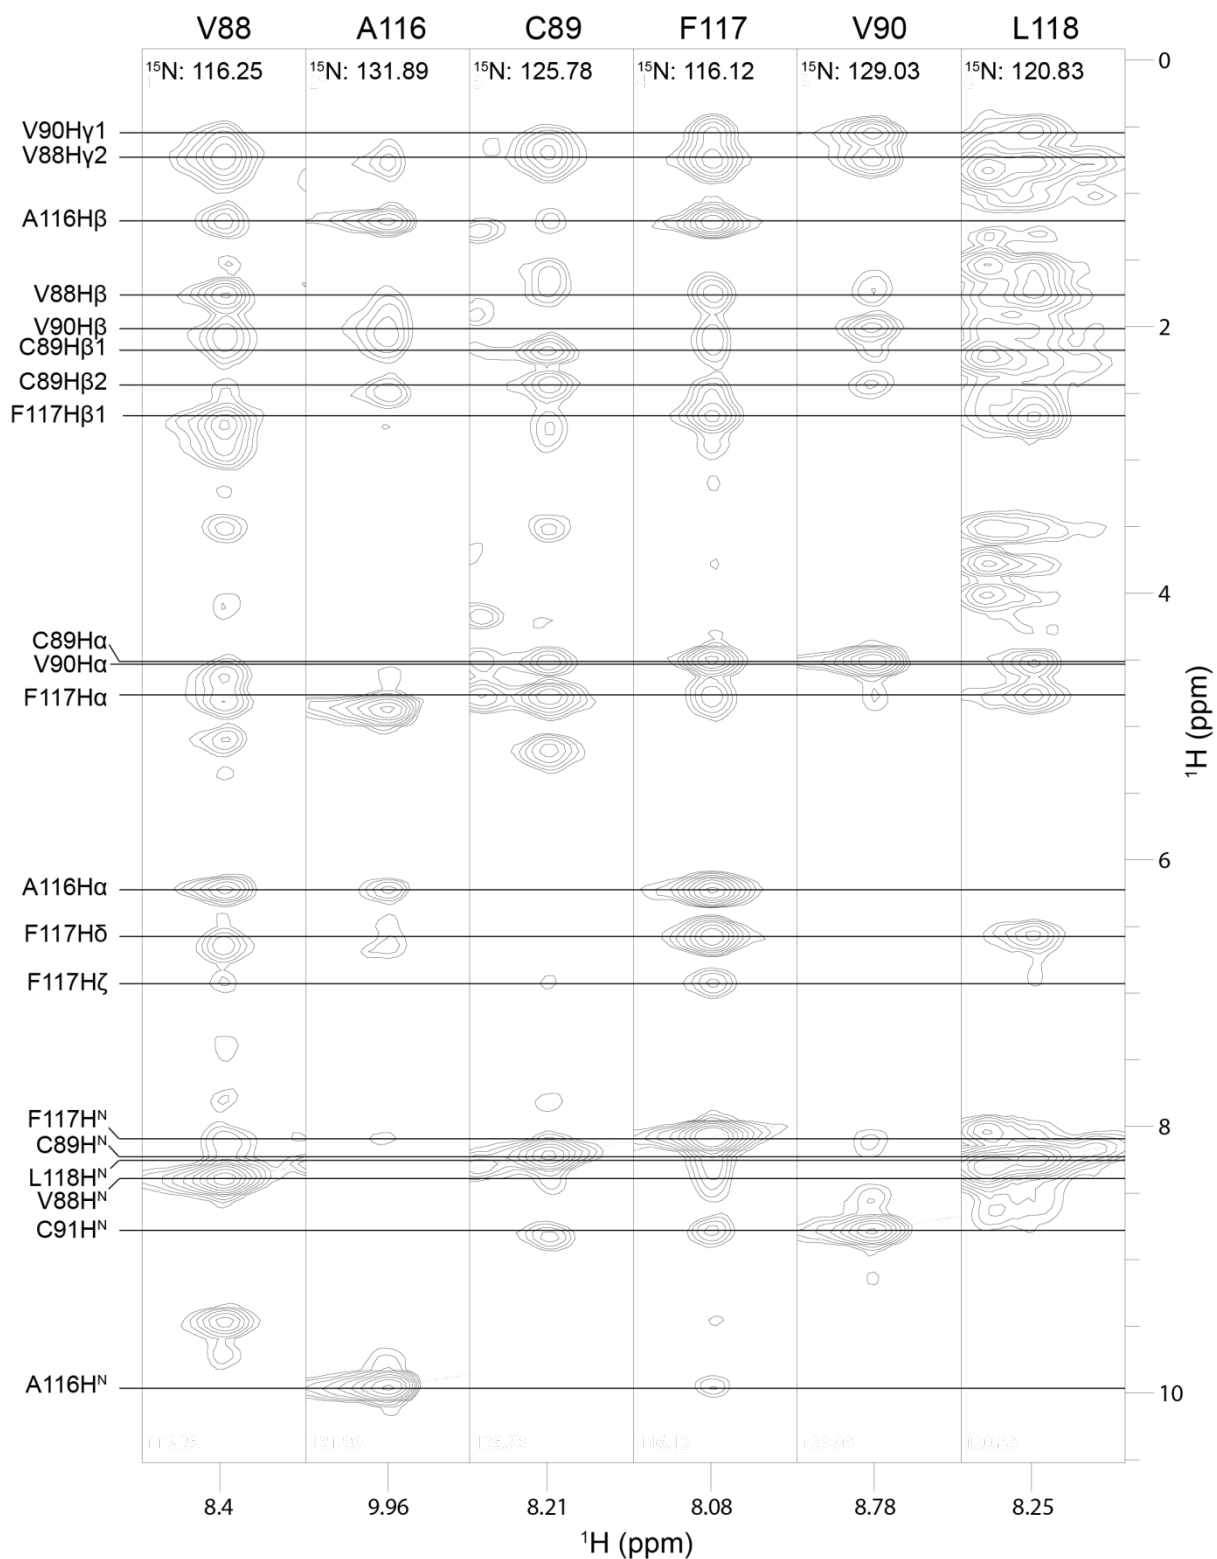

**SI Appendix, Fig. S6.** <sup>15</sup>N-NOESY strips from MAL<sup>TIRC116A</sup> exhibiting short to medium-ranged NOE cross-peaks between residues situated in the βA strand (V88, C89, V90) and the βB strand (A116, F117, L118). The large number of atoms detected between the residues indicates that these residues are in close proximity to one another.

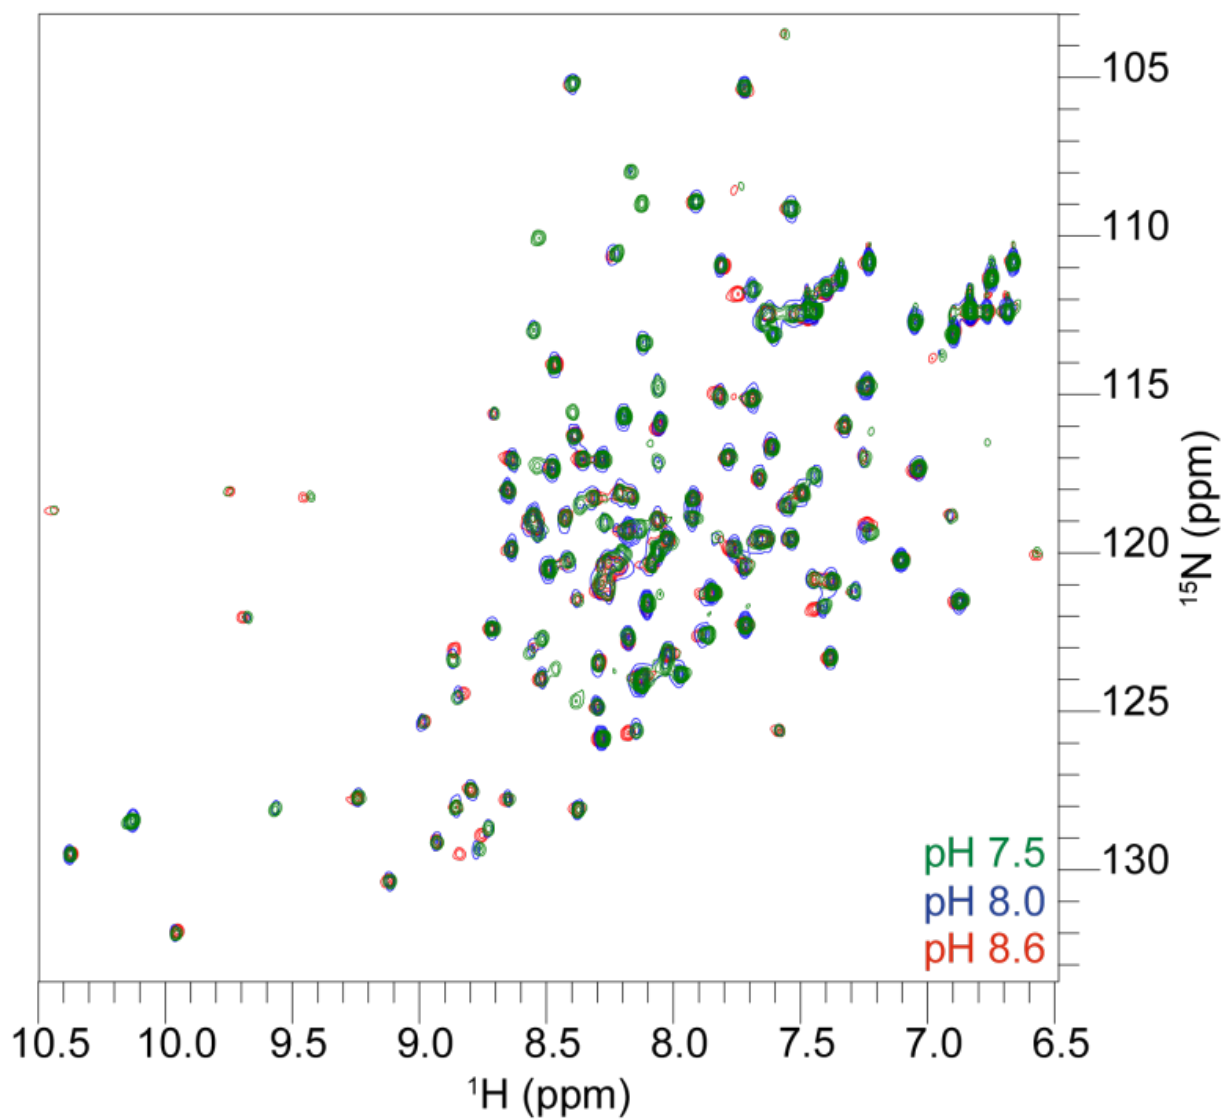

**SI Appendix, Fig. S7.** Overlay of  $^1\text{H}$ - $^{15}\text{N}$ -HSQC spectra of MAL<sup>TIRC116A</sup> at pH 7.5 (green), 8.0 (blue) and 8.6 (red).

**A**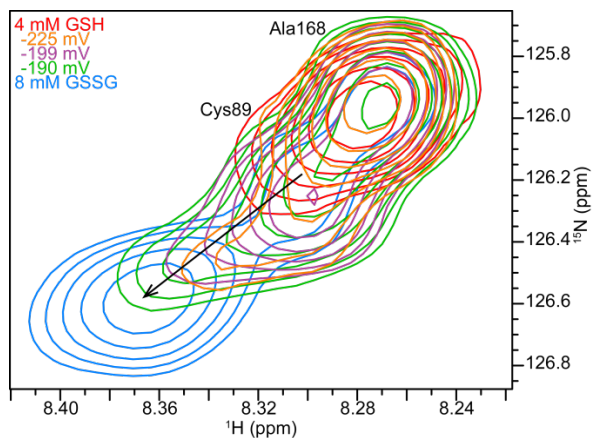**B**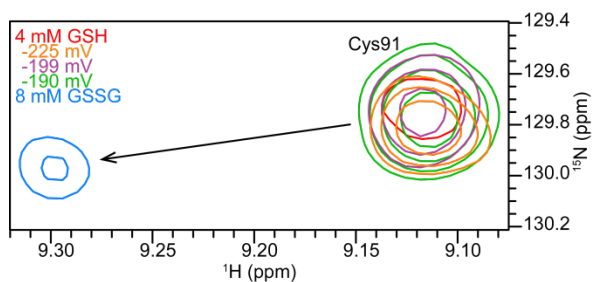**C**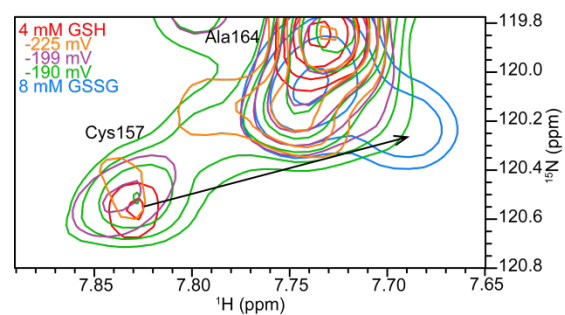

**SI Appendix, Fig. S8.** Cysteine residues C89 (A), C91 (B) and C157 (C) show  $^1\text{H}$  and  $^{15}\text{N}$  shifts following exposure to increasingly oxidising conditions.



**Movie Still S1.** Still image from Movie S1 illustrating the transition between the crystal structure of MAL<sup>TIR</sup> and the solution structure of MAL<sup>TIRC116A</sup> (left to right). The structures are shown in cartoon representation, with the side-chains of C89, C134 and P125 highlighted in stick representation. The movie was generated using UCSF Chimera [1].

**Table S1.** Redox state of cysteine residues in MAL<sup>TIR</sup> produced in different cell types or exposed to redox reagents, as determined by the Ellman's assay.

| <b>Wild-type MAL<sup>TIR</sup> growth condition</b> | <b>Reduced</b> | <b>Oxidized</b> | <b>% Reduced</b> |
|-----------------------------------------------------|----------------|-----------------|------------------|
| BL-21 purified with 10 mM DTT                       | 7              | 0               | 100              |
| BL-21                                               | 6              | 1               | 90               |
| SHuffle                                             | 4              | 3               | 57               |
| Origami                                             | 4              | 3               | 53               |
| H <sub>2</sub> O <sub>2</sub> (0.03 mM)             | 0              | 7               | 0                |

**Table S2.** Number of reduced and oxidised cysteine residues in MAL<sup>TIR</sup> and its mutants produced in SHuffle *E. coli* cells.

| <b>MAL mutant</b> | <b>Oxidised cysteines</b> | <b>Reduced cysteines</b> |
|-------------------|---------------------------|--------------------------|
| <b>wild-type</b>  | 3                         | 4                        |
| <b>C89A</b>       | 3                         | 3                        |
| <b>C91A</b>       | 5                         | 1                        |
| <b>C116A</b>      | 3                         | 3                        |
| <b>C134A</b>      | -                         | -                        |
| <b>C142A</b>      | 2                         | 4                        |
| <b>C157A</b>      | 3-4                       | 2-3                      |
| <b>C174A</b>      | 3                         | 3                        |

**Table S3.** Modifications detected using mass spectrometry, following the addition of oxidized glutathione.

| <b>Cysteine residue</b> | <b>Tris pH 8.6</b>             | <b>Hepes pH 7.5</b>               |
|-------------------------|--------------------------------|-----------------------------------|
| <b>89</b>               | Dehydroalanine                 | Dioxidation                       |
| <b>91</b>               | Glutathionylation, dioxidation | Glutathionylation, dehydroalanine |
| <b>116</b>              | Glutathionylation              | Glutathionylation                 |
| <b>134</b>              | Dehydroalanine                 | Glutathionylation, dehydroalanine |
| <b>142</b>              | Glutathionylation, dioxidation | Glutathionylation, dioxidation    |
| <b>157</b>              | Glutathionylation              | Glutathionylation                 |
| <b>174</b>              | Glutathionylation              | Glutathionylation                 |

**Table S4.** RMSD values of  $^1\text{H}$  and  $^{15}\text{N}$  chemical shifts for cysteine-to-alanine mutants of MAL<sup>TIR</sup> compared to the wild-type protein.

| <b>Cysteine mutant</b> | <b>RMSD (ppm)</b> |
|------------------------|-------------------|
| <b>C89A</b>            | 0.036             |
| <b>C91A</b>            | 0.054             |
| <b>C116A</b>           | 0.075             |
| <b>C134A</b>           | 0.028             |
| <b>C142A</b>           | 0.047             |
| <b>C157A</b>           | 0.120             |
| <b>C174A</b>           | 0.062             |

**Table S5.** Pairwise changes of  $^1\text{H}$  and  $^{15}\text{N}$  chemical shifts between wild-type MAL<sup>TIR</sup> and the cysteine-to-alanine mutants.

| Residue number | C89A/WT | C91A/WT | C116A/WT | C134A/WT | C142A/WT | C157A/WT | C174A/WT |
|----------------|---------|---------|----------|----------|----------|----------|----------|
| 83             | 0.00624 | 0.01300 | 0.01400  | 0.01200  | 0.01300  | 0.00956  | 0.02200  |
| 84             | 0.02100 | 0.00840 | 0.00536  | 0.00901  | 0.00273  | 0.00833  | 0.04900  |
| 85             | 0.15200 | 0.01700 | 0.00000  | 0.00000  | 0.06800  | 0.12700  | 0.23600  |
| 86             | 0.08100 | 0.03900 | 0.07400  | 0.09200  | 0.10600  | 0.10100  | 0.02600  |
| 87             | 0.06600 | 0.02300 | 0.27400  | 0.00930  | 0.01500  | 0.05600  | 0.02100  |
| 88             | 0.01200 | 0.02100 | 0.05000  | 0.01700  | 0.15000  | 0.19000  | 0.04200  |
| 89             |         | 0.05000 | 0.09700  | 0.03400  | 0.01100  | 0.20400  | 0.14100  |
| 90             | 0.17900 | 0.23000 | 0.10200  | 0.08500  | 0.02300  | 0.05100  | 0.03400  |
| 91             | 0.03700 | 0.27200 | 0.10600  | 0.01100  | 0.01900  | 0.11400  | 0.01200  |
| 92             | 0.07100 | 0.10800 | 0.03600  | 0.00362  | 0.04500  | 0.33600  | 0.04700  |
| 93             | 0.02900 | 0.19500 | 0.24000  | 0.00665  | 0.01000  | 0.25800  | 0.04700  |
| 94             |         |         |          |          |          |          |          |
| 95             | 0.00424 | 0.04700 | 0.02300  | 0.01300  | 0.01400  | 0.10600  | 0.00961  |
| 96             | 0.03100 | 0.04800 | 0.01100  | 0.02700  | 0.01800  | 0.12700  | 0.01500  |
| 97             | 0.01100 | 0.01300 | 0.03500  | 0.00840  | 0.01800  | 0.06800  | 0.01700  |
| 98             | 0.01600 | 0.00324 | 0.02600  | 0.01200  | 0.01400  | 0.02300  | 0.01400  |
| 99             | 0.02500 | 0.01400 | 0.09300  | 0.02100  | 0.01700  | 0.07700  | 0.01100  |
| 100            | 0.01900 | 0.07000 | 0.12700  | 0.03100  | 0.01200  | 0.03000  | 0.00883  |
| 101            | 0.02200 | 0.01500 | 0.14700  | 0.00730  | 0.03600  | 0.06300  | 0.01900  |
| 102            | 0.01300 | 0.00713 | 0.08900  | 0.00956  | 0.09100  | 0.06200  | 0.01400  |
| 103            | 0.00765 | 0.04100 | 0.05000  | 0.01400  | 0.03000  | 0.08500  | 0.01800  |
| 104            | 0.03800 | 0.02500 | 0.08300  | 0.08400  | 0.11400  | 0.02200  | 0.03000  |
| 105            | 0.01100 | 0.03900 | 0.12400  | 0.01300  | 0.01600  | 0.02300  | 0.01700  |
| 106            | 0.00306 | 0.05300 | 0.27900  | 0.08100  | 0.00435  | 0.16100  | 0.01600  |
| 107            | 0.03800 | 0.01600 | 0.04900  | 0.01900  | 0.03700  | 0.07500  | 0.03700  |
| 108            | 0.01400 | 0.02100 | 0.01800  | 0.02200  | 0.02000  | 0.11700  | 0.00932  |
| 109            | 0.01600 | 0.02100 | 0.14400  | 0.02200  | 0.02500  | 0.04800  | 0.00857  |
| 110            |         |         |          |          |          |          |          |
| 111            |         |         |          |          |          |          |          |

|     |         |         |         |         |         |         |         |
|-----|---------|---------|---------|---------|---------|---------|---------|
| 112 |         |         |         |         |         |         |         |
| 113 | 0.02000 | 0.02000 | 0.08700 | 0.01800 | 0.00966 | 0.03600 | 0.02500 |
| 114 | 0.05100 | 0.05700 | 0.13600 | 0.02800 | 0.09400 | 0.19900 | 0.13400 |
| 115 | 0.01200 | 0.02100 | 0.65400 | 0.01300 | 0.03300 | 0.10400 | 0.04700 |
| 116 |         |         |         |         |         |         |         |
| 117 | 0.11000 | 0.10000 | 0.11300 | 0.01700 | 0.01700 | 0.02800 | 0.27000 |
| 118 | 0.08200 | 0.11100 | 0.08200 | 0.00947 | 0.12900 | 0.03900 | 0.11300 |
| 119 |         |         |         |         |         |         |         |
| 120 | 0.16400 | 0.22400 | 0.09100 | 0.12300 | 0.15700 | 0.04700 | 0.04600 |
| 121 | 0.11800 | 0.04500 | 0.05000 | 0.10900 | 0.01800 | 0.09800 | 0.06200 |
| 122 | 0.05600 | 0.04400 | 0.09600 | 0.07200 | 0.14000 | 0.25200 | 0.05800 |
| 123 | 0.02000 | 0.02700 | 0.14600 | 0.01700 | 0.01100 | 0.08400 | 0.07000 |
| 124 | 0.01000 | 0.00126 | 0.01600 | 0.00870 | 0.05500 | 0.01700 | 0.00500 |
| 125 |         |         |         |         |         |         |         |
| 126 |         |         |         |         |         |         |         |
| 127 |         |         |         |         |         |         |         |
| 128 |         |         |         |         |         |         |         |
| 129 | 0.01800 | 0.01900 | 0.11000 | 0.03300 | 0.05500 | 0.14400 | 0.02100 |
| 130 | 0.03800 | 0.01700 | 0.01100 | 0.05400 | 0.01400 | 0.08900 | 0.06800 |
| 131 |         |         |         |         |         |         |         |
| 132 |         |         |         |         |         |         |         |
| 133 |         |         |         |         |         |         |         |
| 134 |         |         |         |         |         |         |         |
| 135 |         |         |         |         |         |         |         |
| 136 |         |         |         |         |         |         |         |
| 137 | 0.00984 | 0.00781 | 0.14200 | 0.01100 | 0.03600 | 0.02200 | 0.02800 |
| 138 |         |         |         |         |         |         |         |
| 139 |         |         |         |         |         |         |         |
| 140 | 0.03600 | 0.03700 | 0.02700 | 0.03600 | 0.03200 | 0.02700 | 0.03500 |
| 141 | 0.10900 | 0.02100 | 0.12300 | 0.06800 | 0.21100 | 0.08200 | 0.00650 |

|     |         |         |         |         |         |         |         |
|-----|---------|---------|---------|---------|---------|---------|---------|
| 142 | 0.05100 | 0.02300 | 0.02000 | 0.05000 | 0.31000 | 0.03000 | 0.12200 |
| 143 | 0.09600 | 0.05600 | 0.06300 | 0.06000 | 0.18400 | 0.07300 | 0.13300 |
| 144 | 0.07700 | 0.33900 | 0.11400 | 0.08600 | 0.04000 | 0.43300 | 0.19200 |
| 145 | 0.03300 | 0.11200 | 0.04700 | 0.02600 | 0.11100 | 0.18400 | 0.09300 |
| 146 | 0.02400 | 0.16100 | 0.05400 | 0.01100 | 0.01400 | 0.15000 | 0.01500 |
| 147 | 0.00172 | 0.06900 | 0.01600 | 0.01500 | 0.02300 | 0.17700 | 0.00284 |
| 148 | 0.01800 | 0.02500 | 0.00238 | 0.00982 | 0.02200 | 0.16100 | 0.00000 |
| 149 |         |         |         |         |         |         |         |
| 150 | 0.02400 | 0.02500 | 0.00860 | 0.02000 | 0.02200 | 0.07400 | 0.01000 |
| 151 | 0.01300 | 0.03000 | 0.01600 | 0.01200 | 0.02600 | 0.12300 | 0.00000 |
| 152 | 0.01600 | 0.01600 | 0.02000 | 0.00872 | 0.01900 | 0.09300 | 0.00196 |
| 153 | 0.00875 | 0.06500 | 0.01500 | 0.02200 | 0.01400 | 0.41600 | 0.00747 |
| 154 | 0.02600 | 0.01400 | 0.01300 | 0.00311 | 0.01600 | 0.36200 | 0.00115 |
| 155 |         |         |         |         |         |         |         |
| 156 | 0.01400 | 0.23000 | 0.00000 | 0.00000 | 0.01900 | 0.02100 | 0.01400 |
| 157 | 0.02500 | 0.08900 | 0.02500 | 0.00980 | 0.01400 |         | 0.01200 |
| 158 | 0.02500 | 0.08300 | 0.01100 | 0.02400 | 0.04600 | 0.06500 | 0.01400 |
| 159 | 0.09300 | 0.07100 | 0.00000 | 0.00000 | 0.13200 | 0.08300 | 0.13800 |
| 160 | 0.03200 | 0.11300 | 0.00000 | 0.00717 | 0.01500 | 0.06900 | 0.04900 |
| 161 | 0.02000 | 0.06500 | 0.01700 | 0.03700 | 0.02800 | 0.08000 | 0.00307 |
| 162 | 0.00931 | 0.07400 | 0.00587 | 0.02200 | 0.03100 | 0.08200 | 0.04400 |
| 163 | 0.01000 | 0.00930 | 0.00000 | 0.02400 | 0.01000 | 0.03200 | 0.06500 |
| 164 | 0.02000 | 0.04500 | 0.03000 | 0.04000 | 0.03500 | 0.11100 | 0.11800 |
| 165 | 0.02400 | 0.09600 | 0.04400 | 0.02100 | 0.03000 | 0.10900 | 0.13700 |
| 166 | 0.02900 | 0.11000 | 0.00972 | 0.03300 | 0.00992 | 0.26100 | 0.07500 |
| 167 | 0.03400 | 0.01800 | 0.01400 | 0.05100 | 0.04100 | 0.02800 | 0.05100 |
| 168 | 0.02300 | 0.00222 | 0.04100 | 0.04400 | 0.07500 | 0.21200 | 0.09000 |
| 169 |         |         |         |         |         |         |         |
| 170 |         |         |         |         |         |         |         |
| 171 | 0.02900 | 0.03300 | 0.04000 | 0.05300 | 0.03300 | 0.04100 | 0.08900 |

|     |         |         |         |         |         |         |         |
|-----|---------|---------|---------|---------|---------|---------|---------|
| 172 | 0.01100 | 0.01000 | 0.01300 | 0.05300 | 0.05700 | 0.09900 | 0.02500 |
| 173 | 0.02400 | 0.01600 | 0.08200 | 0.00484 | 0.10900 | 0.08800 | 0.53300 |
| 174 | 0.03500 | 0.02500 | 0.06700 | 0.01600 | 0.11500 | 0.04900 |         |
| 175 | 0.05400 | 0.02300 | 0.10300 | 0.01700 | 0.05700 | 0.12700 | 0.09600 |
| 176 | 0.04900 | 0.05200 | 0.03300 | 0.01100 | 0.02500 | 0.02500 | 0.09900 |
| 177 |         |         |         |         |         |         |         |
| 178 | 0.01700 | 0.03800 | 0.01200 | 0.00233 | 0.05700 | 0.05400 | 0.02300 |
| 179 | 0.01700 | 0.02000 | 0.01200 | 0.01100 | 0.00732 | 0.09600 | 0.04500 |
| 180 | 0.01400 | 0.01900 | 0.01100 | 0.02000 | 0.06253 | 0.09600 | 0.01100 |
| 181 |         |         |         |         |         |         |         |
| 182 | 0.01800 | 0.02200 | 0.02300 | 0.01500 | 0.01400 | 0.07700 | 0.01900 |
| 183 |         |         |         |         |         |         |         |
| 184 |         |         |         |         |         |         |         |
| 185 |         |         |         |         |         |         |         |
| 186 | 0.01300 | 0.02100 | 0.00000 | 0.00000 | 0.01200 | 0.04100 | 0.01800 |
| 187 | 0.00000 | 0.00504 | 0.00000 | 0.00000 | 0.00757 | 0.03500 | 0.10500 |
| 188 |         |         |         |         |         |         |         |
| 189 |         |         |         |         |         |         |         |
| 190 | 0.01100 | 0.03000 | 0.02500 | 0.00950 | 0.00317 | 0.20000 | 0.04800 |
| 191 | 0.01200 | 0.04600 | 0.01500 | 0.01600 | 0.01600 | 0.03700 | 0.00169 |
| 192 |         |         |         |         |         |         |         |
| 193 |         |         |         |         |         |         |         |
| 194 |         |         |         |         |         |         |         |
| 195 |         |         |         |         |         |         |         |
| 196 |         |         |         |         |         |         |         |
| 197 |         |         |         |         |         |         |         |
| 198 |         |         |         |         |         |         |         |
| 199 | 0.00392 | 0.02400 | 0.04600 | 0.01200 | 0.01100 | 0.15300 | 0.02400 |
| 200 | 0.00844 | 0.00202 | 0.00250 | 0.01100 | 0.02400 | 0.07700 | 0.01400 |
| 201 |         |         |         |         |         |         |         |



|     |         |         |         |         |         |         |         |
|-----|---------|---------|---------|---------|---------|---------|---------|
| 202 |         |         |         |         |         |         |         |
| 203 |         |         |         |         |         |         |         |
| 204 | 0.00972 | 0.00824 | 0.02300 | 0.01300 | 0.01500 | 0.01000 | 0.00807 |
| 205 | 0.01300 | 0.02700 | 0.03000 | 0.01100 | 0.02200 | 0.08000 | 0.02000 |
| 206 | 0.00000 | 0.02000 | 0.00000 | 0.00000 | 0.00779 | 0.05500 | 0.01400 |
| 207 |         |         |         |         |         |         |         |
| 208 | 0.05100 | 0.04700 | 0.01000 | 0.05000 | 0.00821 | 0.07500 | 0.03400 |
| 209 | 0.01100 | 0.01600 | 0.00689 | 0.01200 | 0.05500 | 0.11500 | 0.08400 |
| 210 | 0.01600 | 0.04600 | 0.01900 | 0.01900 | 0.04700 | 0.03500 | 0.02400 |
| 211 | 0.02100 | 0.01700 | 0.03000 | 0.01500 | 0.02200 | 0.04200 | 0.00775 |
| 212 | 0.00677 | 0.00652 | 0.02200 | 0.01100 | 0.05000 | 0.03100 | 0.05500 |
| 213 | 0.03000 | 0.01300 | 0.05200 | 0.01100 | 0.01200 | 0.03300 | 0.12300 |
| 214 | 0.04900 | 0.01700 | 0.11600 | 0.04100 | 0.03600 | 0.01800 | 0.00652 |
| 215 | 0.01300 | 0.01600 | 0.09700 | 0.01300 | 0.02100 | 0.05100 | 0.01800 |
| 216 | 0.00443 | 0.02000 | 0.05000 | 0.01400 | 0.03300 | 0.06400 | 0.05500 |
| 217 | 0.01500 | 0.01900 | 0.02900 | 0.01000 | 0.03000 | 0.01500 | 0.02500 |
| 218 | 0.03800 | 0.00506 | 0.06500 | 0.00923 | 0.06500 | 0.04300 | 0.02800 |
| 219 | 0.00783 | 0.01600 | 0.02100 | 0.01300 | 0.02300 | 0.00563 | 0.00707 |
| 220 | 0.01300 | 0.01700 | 0.00323 | 0.02000 | 0.01500 | 0.02200 | 0.01000 |
| 221 | 0.01300 | 0.01400 | 0.00776 | 0.00930 | 0.02100 | 0.04800 | 0.01600 |

**Table S6.** NMR structure statistics<sup>a</sup> for MAL<sup>TIRC116A</sup>

| Experimental restraints <sup>b</sup>                    |             |
|---------------------------------------------------------|-------------|
| Inter-proton distance restraints                        |             |
| <i>Intra-residue</i>                                    | 362         |
| <i>Sequential</i>                                       | 422         |
| <i>Medium-range (i-j &lt; 5)</i>                        | 317         |
| <i>Long-range (i-j &gt; 5)</i>                          | 262         |
| Dihedral-angle restraints                               | 216         |
| Total number of restraints per residue                  | 11.12       |
| Mean RMSD of the 20-structure ensemble (Å) <sup>c</sup> |             |
| Backbone atoms (residues 85–120, 134–179 & 204–220)     | 0.94 ± 0.17 |
| All heavy atoms (residues 85–120, 134–179 & 204–220)    | 1.28 ± 0.14 |
| Stereochemical quality <sup>d</sup>                     |             |
| Residues in most favoured Ramachandran region (%)       | 78.0        |
| Ramachandran outliers (%)                               | 0 ± 0       |

<sup>a</sup>All statistics are given as mean ± SD.

<sup>b</sup>Only structurally relevant restraints, as defined by CYANA, are included.

<sup>c</sup>Mean RMSD calculated over the entire ensemble of 20 structures.

<sup>d</sup>As reported by CYANA [2].

**Table S7.** RMSD (ppm) comparison between the <sup>1</sup>H and <sup>15</sup>N chemical shifts of MAL<sup>TIR</sup> nuclei at pH 8.0 and 8.6 compared to 7.5.

| pH  | 7.5   |
|-----|-------|
| 8.0 | 0.006 |
| 8.6 | 0.017 |

## SI Appendix References:

1. Pettersen, E.F., et al., *UCSF Chimera--a visualization system for exploratory research and analysis*. J Comput Chem, 2004. **25**(13): p. 1605-12.
2. Vranken, W.F., et al., *The CCPN data model for NMR spectroscopy: development of a software pipeline*. Proteins, 2005. **59**(4): p. 687-96.
